# Supplementary material for: Epigenetic patterns newly established after interspecific hybridization in natural populations of Solanum
Source: PubMed Central journal article supplement (PMC3810873; doi:10.1002/ece3.758), 2013-09-09

**Fig. S1** Cluster analyses of *Solanum kurtzianum*, *Solanum microdontum* and *Solanum x rechei* based on morphological (a), AFLP (b) and MSAP (c) data. For the AFLP and MSAP dendrograms bootstrap values are shown above the branches.

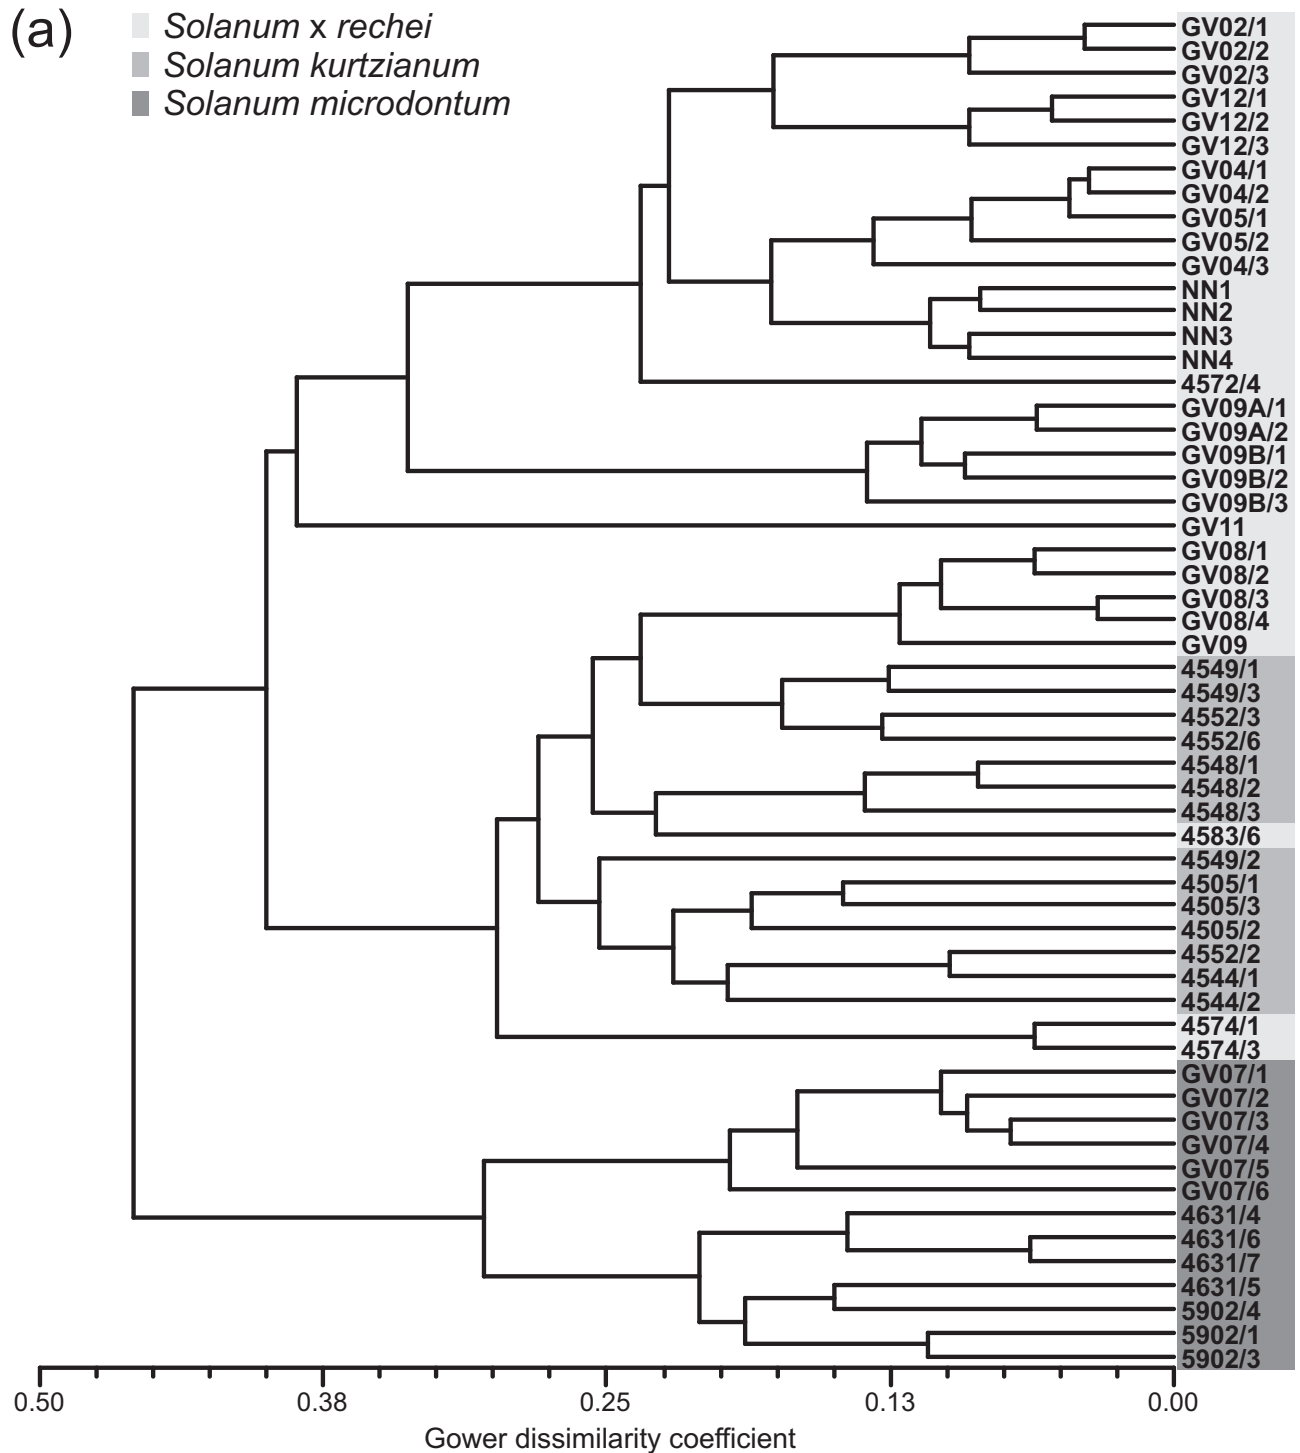

- (b)
- *Solanum x rechei*
  - *Solanum kurtzianum*
  - *Solanum microdontum*

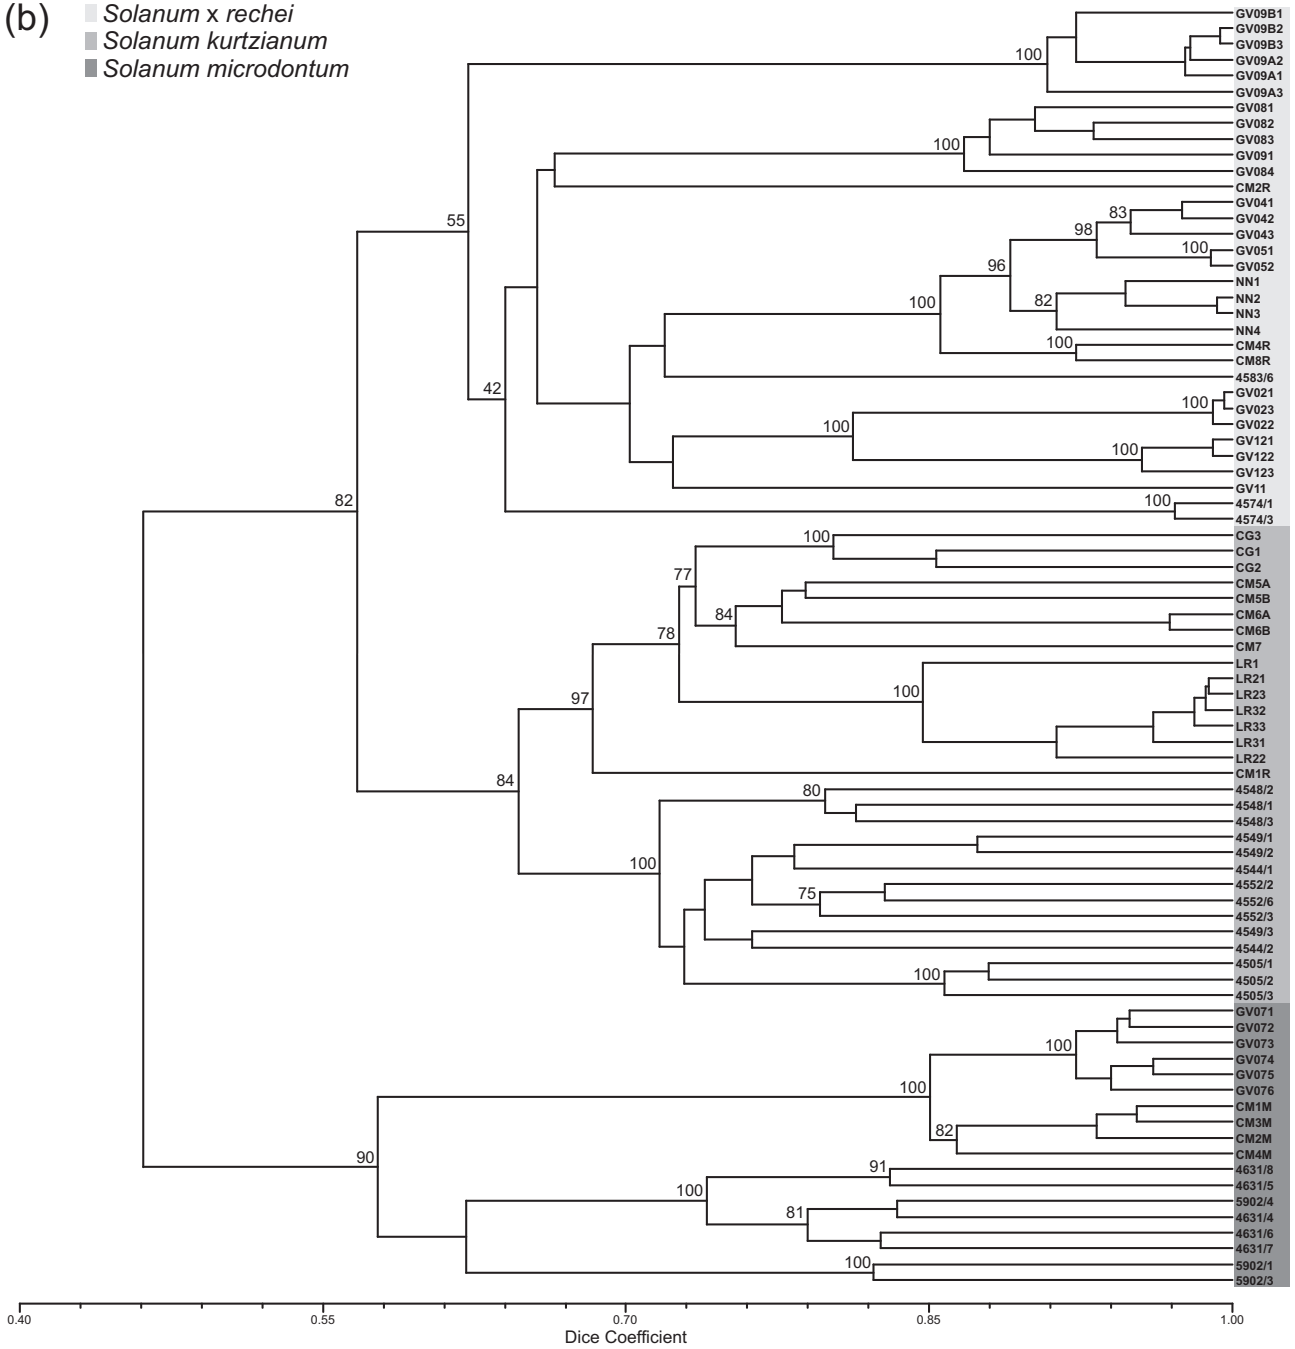

(c)

- *Solanum x rechei*
- *Solanum kurtzianum*
- *Solanum microdontum*

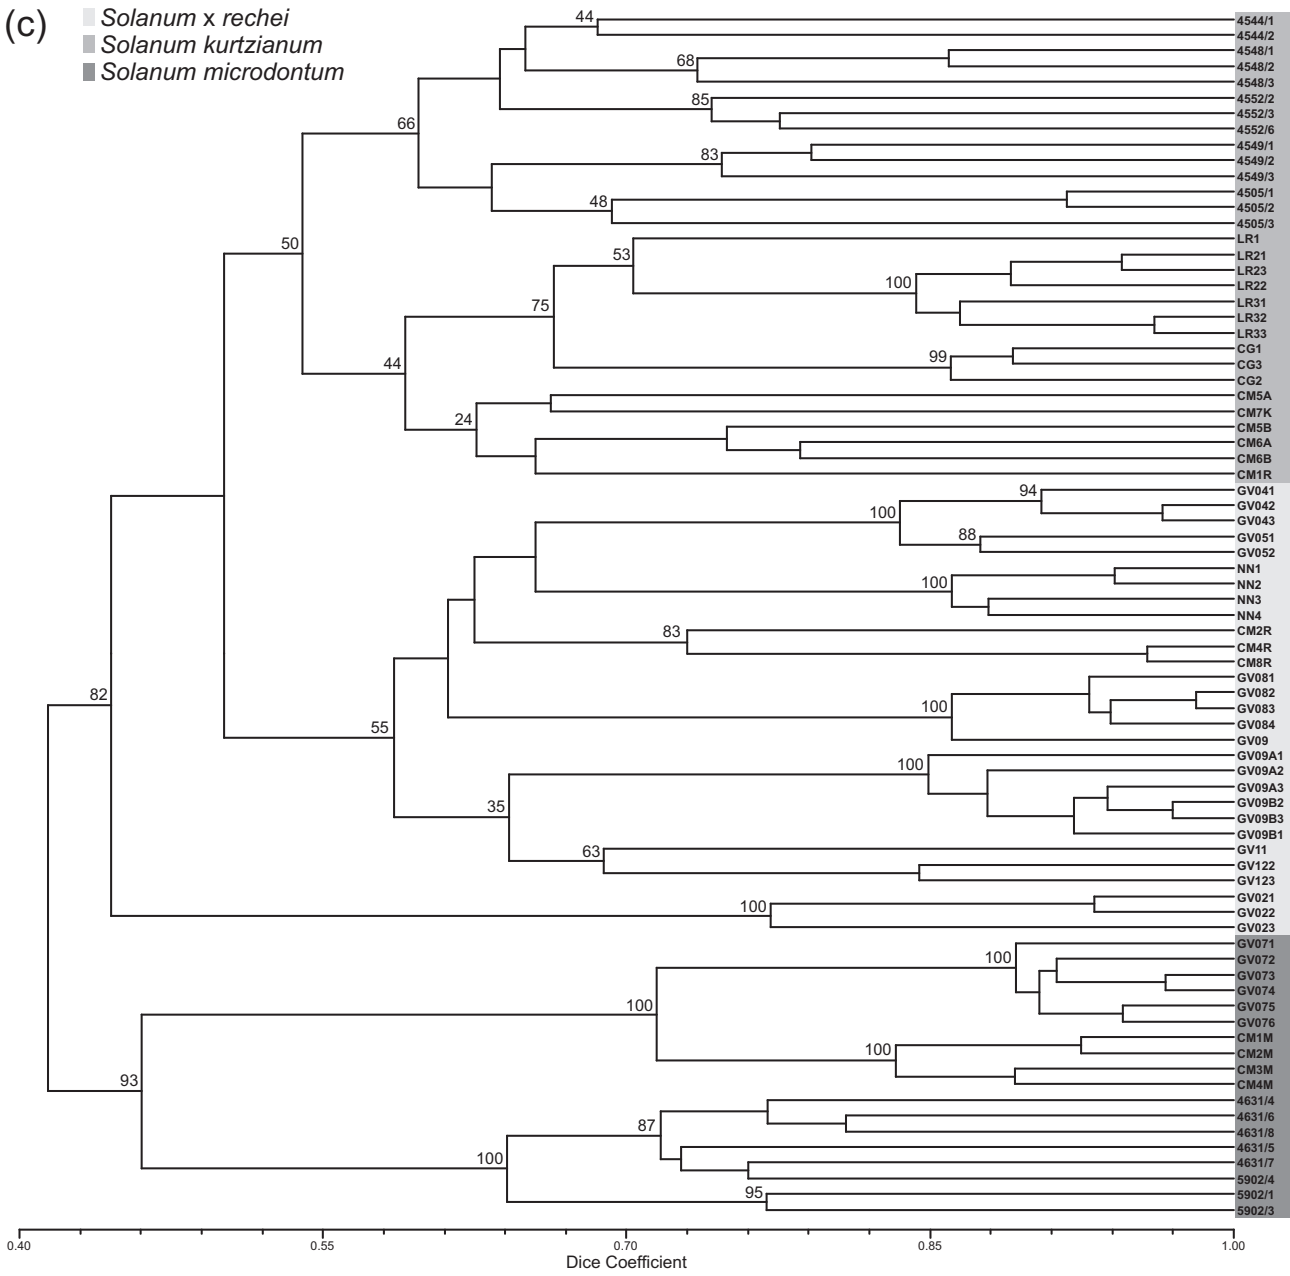

Supplement: ece30003-3764-SD1.pdf [file ece30003-3764-SD1.pdf]
