# Supplementary material for: Epigenetic patterns newly established after interspecific hybridization in natural populations of Solanum
Source: PubMed Central journal article supplement (PMC3810873; doi:10.1002/ece3.758), 2013-09-09

**Fig. S3** Total number of fragments per species and mean number of fragments per individual obtained by AFLP (a) and MSAP (b) techniques. *Different letters indicate statistically significant difference at  $P < 0.01$ .*

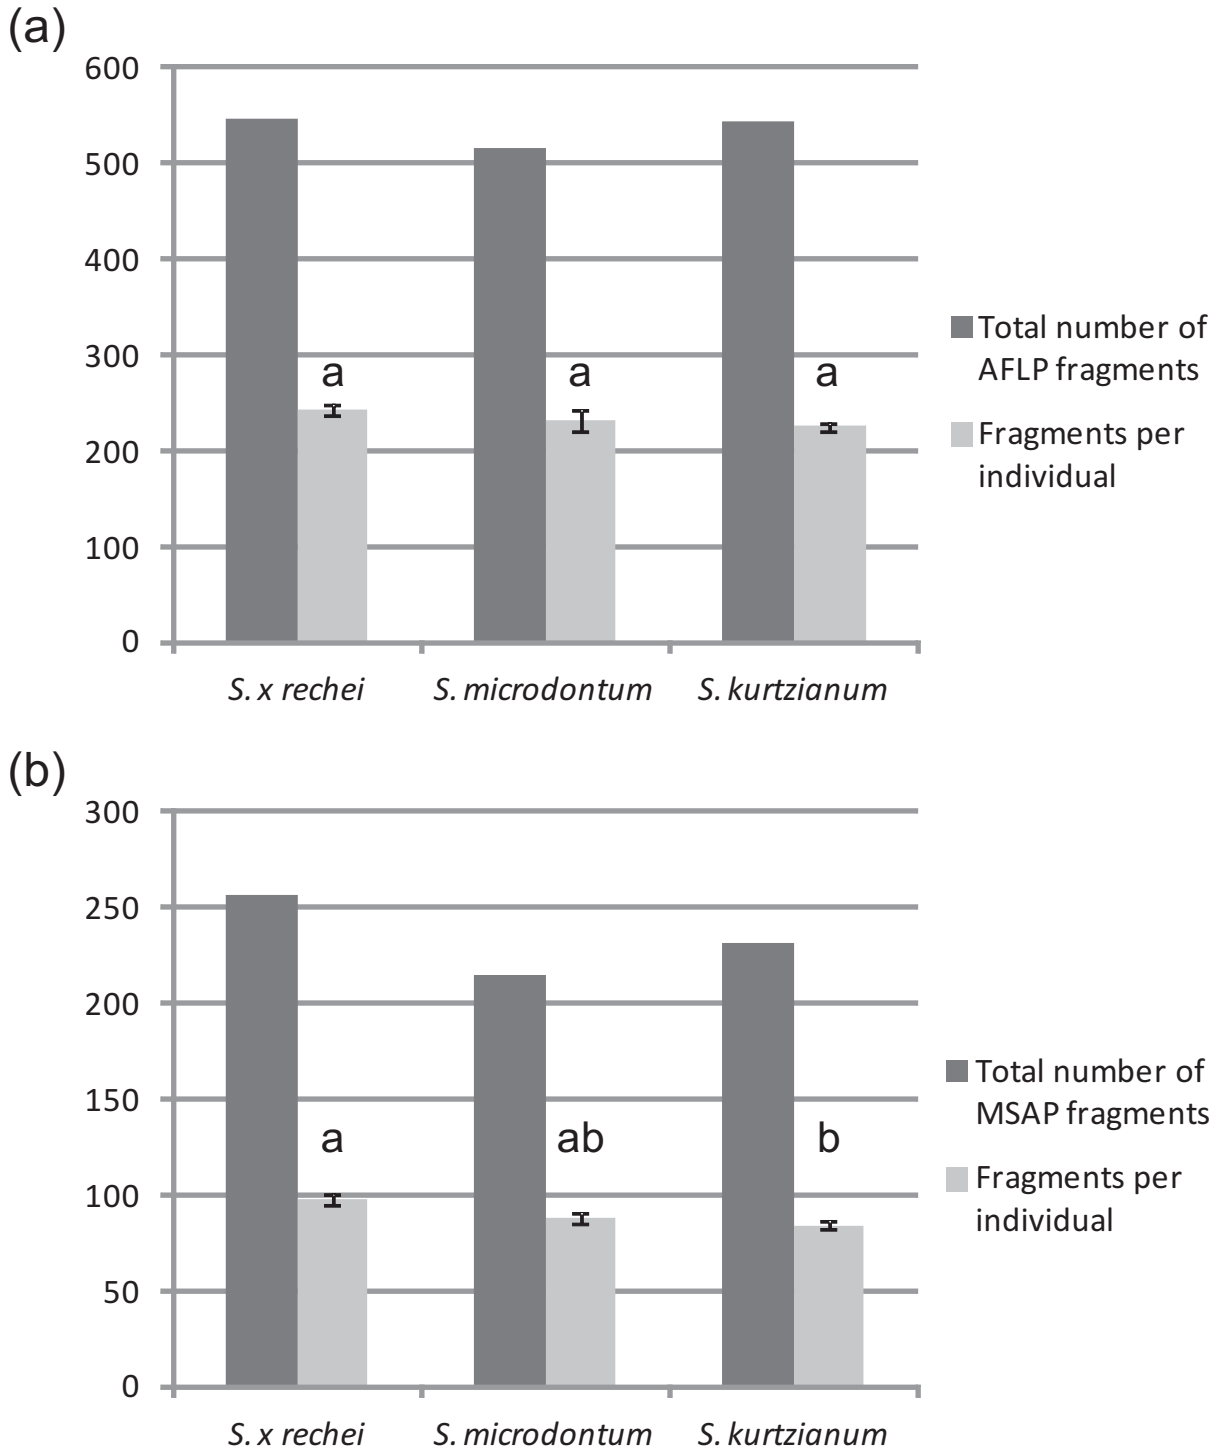

Supplement: ece30003-3764-SD3.pdf [file ece30003-3764-SD3.pdf]
