# Supplementary material for: Epigenetic patterns newly established after interspecific hybridization in natural populations of Solanum
Source: PubMed Central journal article supplement (PMC3810873; doi:10.1002/ece3.758), 2013-09-09

Fig. S4 Similarity coefficients and Delta K values for AFLP and MSAP datasets.

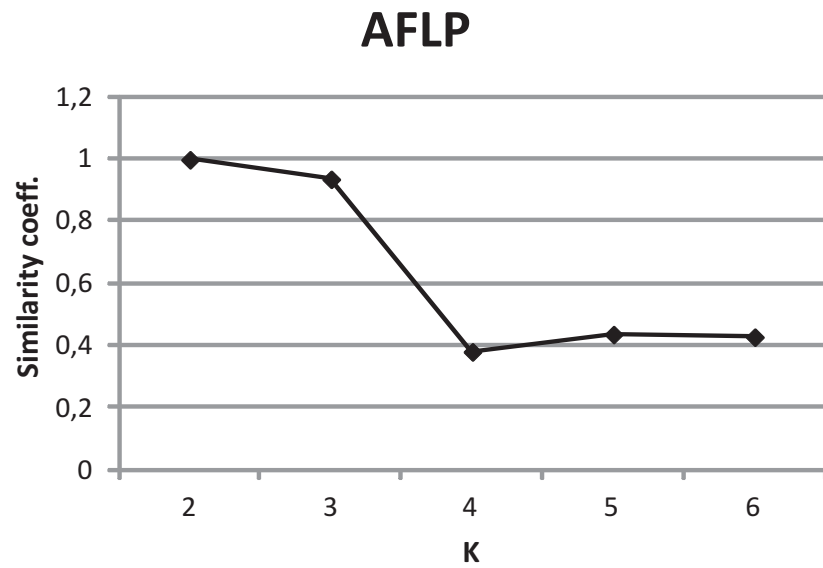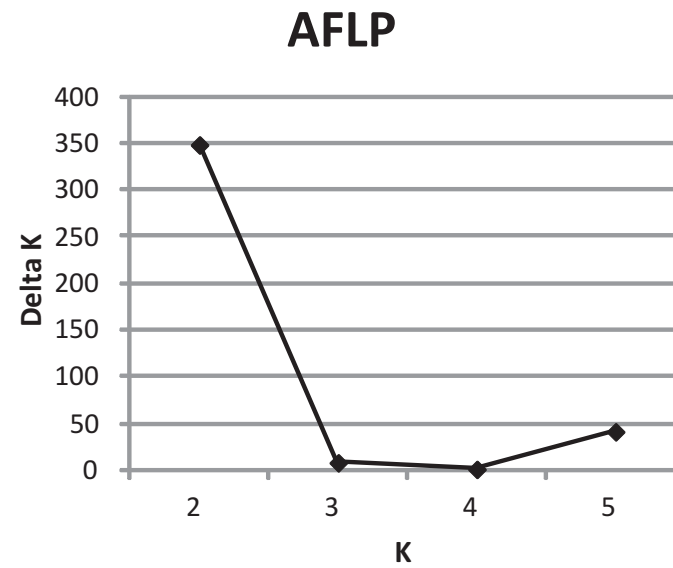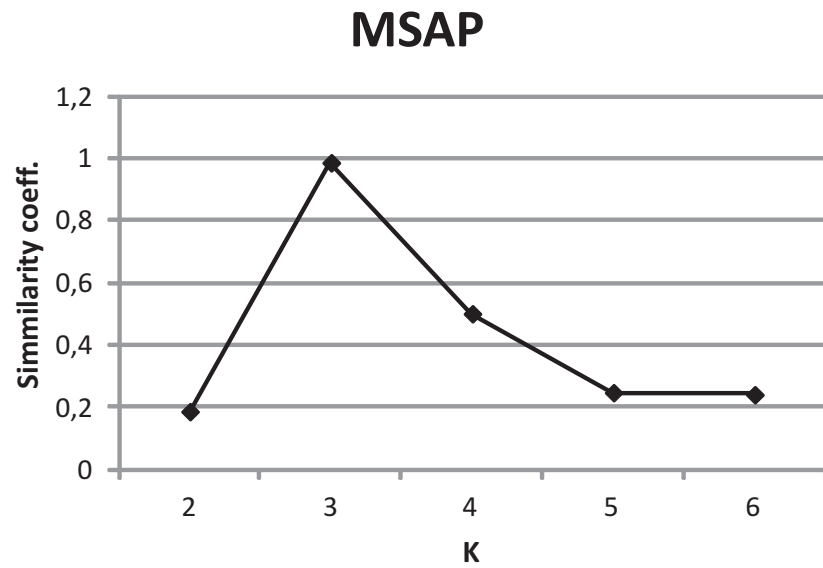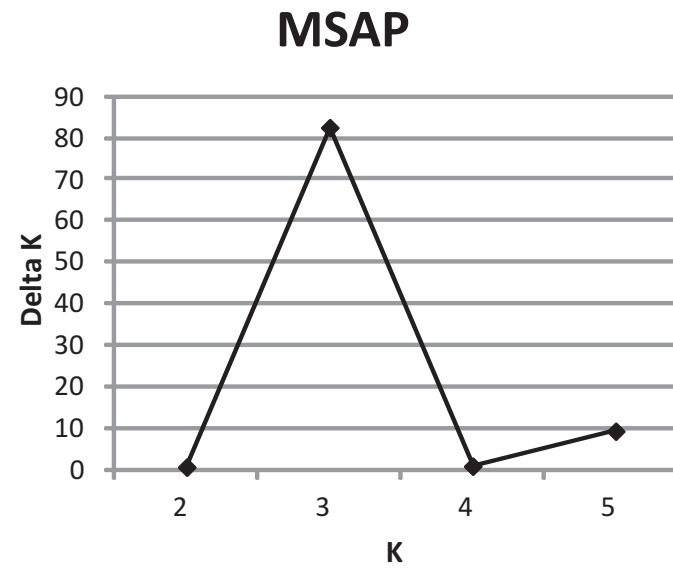

Supplement: ece30003-3764-SD4.pdf [file ece30003-3764-SD4.pdf]
