# Supplementary material for: Epigenetic patterns newly established after interspecific hybridization in natural populations of Solanum
Source: PubMed Central journal article supplement (PMC3810873; doi:10.1002/ece3.758), 2013-09-09

**Fig. S5** Scan to identify epiloci subject to selection using BayeScan. Each dot corresponds to an MSAP locus.  $F_{ST}$  is plotted against the  $\log_{10}$  of the posterior odds (PO), which provides evidence whether the locus is subject to selection or not. Arrows on the x axis from left to right show the minimum threshold for strong, very strong, and decisive evidence for selection on Jeffreys' scale.

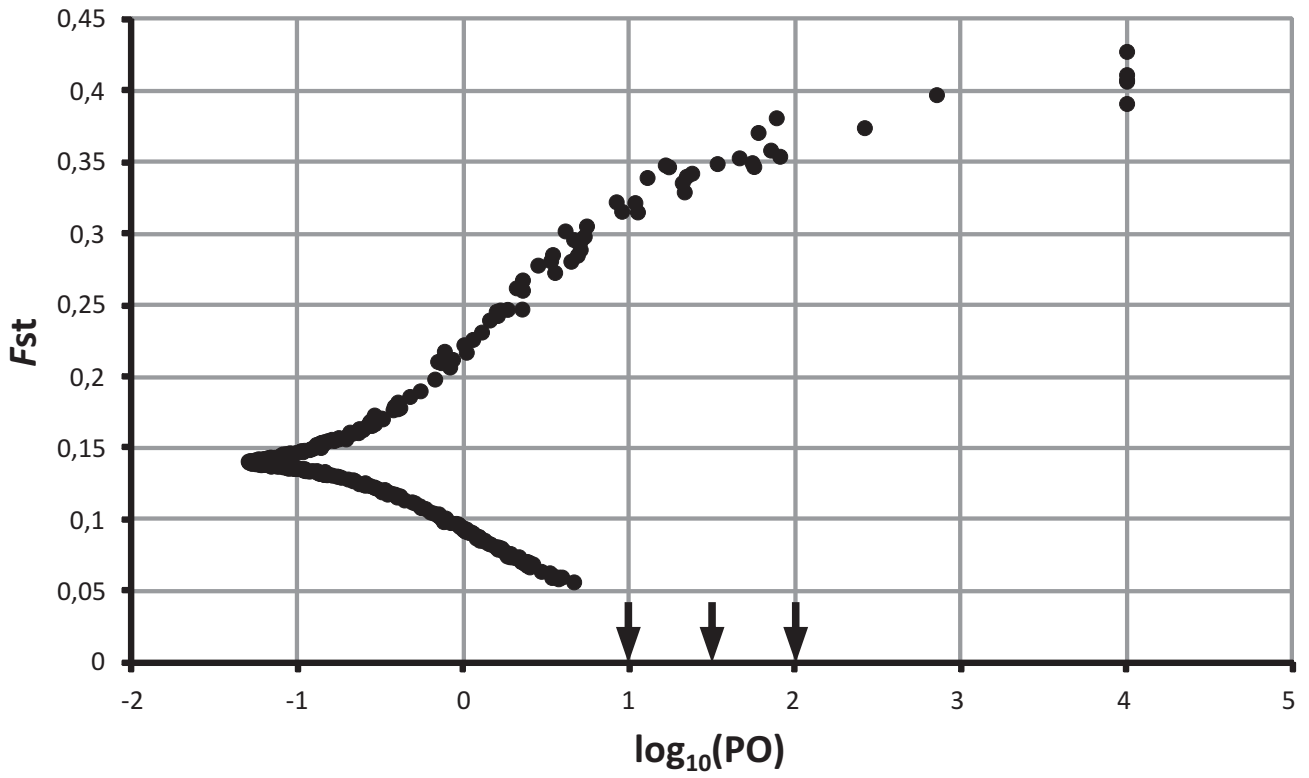

Supplement: ece30003-3764-SD5.pdf [file ece30003-3764-SD5.pdf]
